# Supplementary material for: Acral Melanoma Is Infiltrated with cDC1s and Functional Exhausted CD8 T Cells Similar to the Cutaneous Melanoma of Sun-Exposed Skin
Source: MDPI journal article supplement (doi:10.3390/ijms24054786), 2023-03-01
Supplement: s1 [file s1]

## **Supplementary material**

### Supplementary Tables

| Patient | Age | Sex | Melanoma type | Stage | Breslow | Primary lesion | Sun exposure |
|---------|-----|-----|---------------|-------|---------|----------------|--------------|
| 1       | 66  | M   | NACM          | I     | 2       | Scalp          | High         |
| 2       | 53  | F   | NACM          | I     | 0.8     | Leg            | High         |
| 3       | 81  | M   | NACM          | III   | 23      | Back           | High         |
| 4       | 74  | F   | NACM          | II    | 3       | Leg            | High         |
| 5       | 70  | M   | NACM          | I     | 0.3     | Scalp          | High         |
| 6       | 78  | F   | NACM          | I     | 0.25    | Malar region   | High         |
| 7       | 76  | M   | NACM          | I     | 7       | Face           | High         |
| 8       | 67  | F   | NACM          | I     | 0.1     | Lower eyelid   | High         |
| 9       | 68  | M   | AM            | II    | 3       | Sole           | Low          |
| 10      | 79  | M   | AM            | I     | 1.1     | Toe            | Low          |
| 11      | 73  | F   | AM            | III   | 4       | Sole           | Low          |
| 12      | 59  | F   | AM            | I     | 0.6     | Sole           | Low          |
| 13      | 72  | M   | AM            | I     | NR      | Sole           | Low          |
| 14      | 85  | M   | AM            | I     | 0.3     | Sole           | Low          |
| 15      | 67  | F   | AM            | II    | 12      | Sole           | Low          |
| 16      | 85  | F   | AM            | I     | 2       | Sole           | Low          |
| 17      | 61  | M   | AM            | III   | 7       | Sole           | Low          |
| 18      | 66  | F   | AM            | II    | 11      | Sole           | Low          |
| 19      | 50  | F   | AM            | III   | 11      | Sole           | Low          |
| 20      | 75  | F   | AM            | III   | 4       | Sole           | Low          |
| 21      | 68  | M   | AM            | II    | 12      | Sole           | Low          |
| 22      | 51  | F   | AM            | IV    | 12      | Sole           | Low          |
| 23      | 70  | M   | AM            | I     | 0.3     | Sole           | Low          |
| 24      | 41  | M   | AM            | II    | 2.2     | Sole           | Low          |
| 25      | 78  | M   | AM            | III   | 13      | Sole           | Low          |
| 26      | 37  | F   | AM            | I     | NR      | Toe            | Low          |
| 27      | 63  | M   | AM            | III   | 13      | Toe            | Low          |
| 28      | 61  | F   | AM            | I     | NR      | Toe            | Low          |
| 29      | 74  | M   | AM            | III   | 2       | Finger         | Low          |
| 30      | 73  | F   | AM            | II    | 23      | Toe            | Low          |
| 31      | 65  | F   | AM            | II    | 13      | Sole           | Low          |
| 32      | 83  | F   | AM            | II    | 3       | Sole           | Low          |
| 33      | 77  | M   | AM            | III   | 13      | Toe            | Low          |
| 34      | 70  | F   | AM            | III   | 16      | Finger         | Low          |
| 35      | 59  | F   | AM            | II    | 4       | Finger         | Low          |
| 36      | 65  | M   | AM            | II    | 6       | Toe            | Low          |
| 37      | 53  | M   | AM            | I     | 0.4     | Sole           | Low          |
| 38      | 56  | F   | AM            | II    | 2       | Heel           | Low          |
| 39      | 81  | M   | NACM          | IV    | NR      | Shoulder       | High         |
| 40      | 55  | M   | NACM          | IV    | NR      | Dorsum of hand | High         |
| 41      | 71  | M   | NACM          | IV    | NR      | Chest          | High         |
| 42      | 66  | F   | NACM          | IV    | NR      | Behind the ear | High         |
| 43      | 64  | F   | NACM          | IV    | NR      | Leg            | High         |

**Supplementary Table S1. Demographic and clinical characteristics of NACM and AM patients.** Description of age, sex (F- Female and M- Male), Stage and Breslow index for every patient in the cohort. Primary lesions were considered to establish the amount of sun exposition of the skin as well as to classify patients as NACM and AM. The rows in blue represent the five additional advanced NACM samples taken from patients of other IMSS and private hospitals that were used for the analysis of Figures 2-6.

| ANTIBODY                 | BRAND      | CLONE       | CAT NUMBER | ASSAY               |
|--------------------------|------------|-------------|------------|---------------------|
| CD45-PE/Cy7              | Biolegend  | H130        | 304016     | Flow Cytometry      |
| CD45RO-PE/Dazzle94       | Biolegend  | UCHL1       | 304247     | Flow Cytometry      |
| CD8-APC/Cy7              | Biolegend  | SK1         | 344713     | Flow Cytometry      |
| CD4-BV650                | Biolegend  | OKT4        | 317436     | Flow Cytometry      |
| CD69-BV750               | Biolegend  | FN50        | 310953     | Flow Cytometry      |
| PD-1-PE                  | Biolegend  | EH12.2H7    | 329906     | Flow Cytometry & IF |
| Live/Dead Fixable Violet | Invitrogen |             | L34955     | Flow Cytometry      |
| IFN- $\gamma$ -BV510     | Biolegend  | 4S.B3       | 502543     | Flow Cytometry      |
| KI-67-BV605              | Biolegend  | Ki-67       | 350522     | Flow Cytometry      |
| CD11c-purified           | Abcam      | EP1347Y     | ab52632    | IF                  |
| HLA-DR-purified          | Invitrogen | YD1/63.4.10 | MA1-70113  | IF                  |
| BDCA3-purified           | Abcam      | PBS-01      | ab6980     | IF                  |
| HMB-15-Alexa Fluor 647   | Biolegend  | HMB-45      | 911506     | IF                  |
| MART1-purified           | Abcam      | EPR20380    | ab210546   | IF                  |
| CD8-purified             | Invitrogen | YTC182.20   | MA1-81692  | IF                  |
| PD-L1-APC                | Biolegend  | 29E.2A3     | 329708     | IF                  |
| IFN- $\gamma$ -FITC      | SONY       | B27         | 3132520    | IF                  |
| KI-67-purified           | Invitrogen | SolA15      | 14-5698-82 | IF                  |

**Supplementary Table S2.** List of antibodies used to perform the flow cytometry or immunofluorescence (IF) assays.

## Supplementary Figures

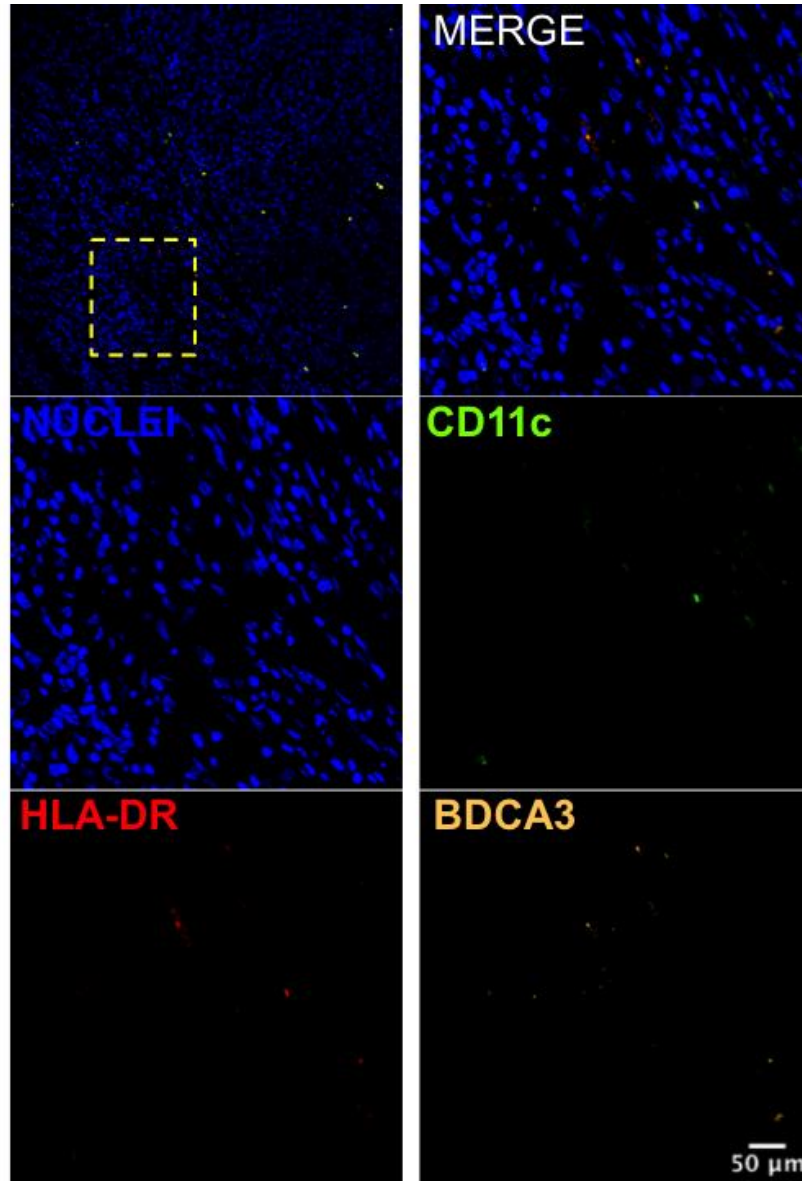

**Supplementary Figure S1.** DCs autofluorescence staining control. Tissue was processed in the same way as the experimental staining, except no primary antibodies anti-CD11c, -HLA-DR and -BDCA3 were added. Top panels show the merged images at 20x (left) and a digital zoom of the selected area (right). Middle and low panels show the signal of each channel to provide a better appreciation of the autofluorescence of each fluorochrome in the tissue.

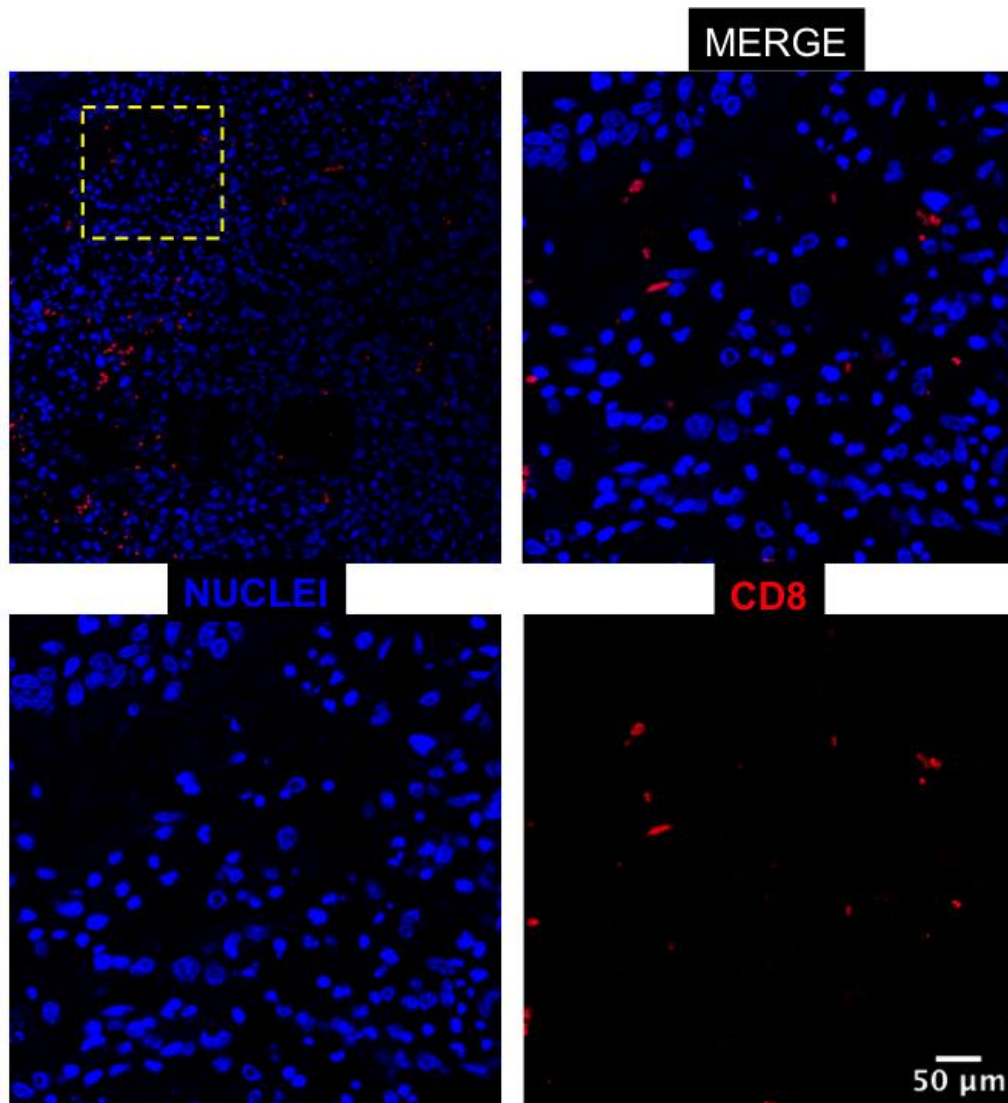

**Supplementary Figure S2.** CD8 autofluorescence staining control. Tissue was processed in the same way as the experimental staining, except no primary antibody (anti-CD8) was added. Top panels show the merged images at 20x (left) and a digital zoom of the selected area (right). Low panels show the signal of each channel to provide a better appreciation of the autofluorescence of each fluorochrome in the tissue.

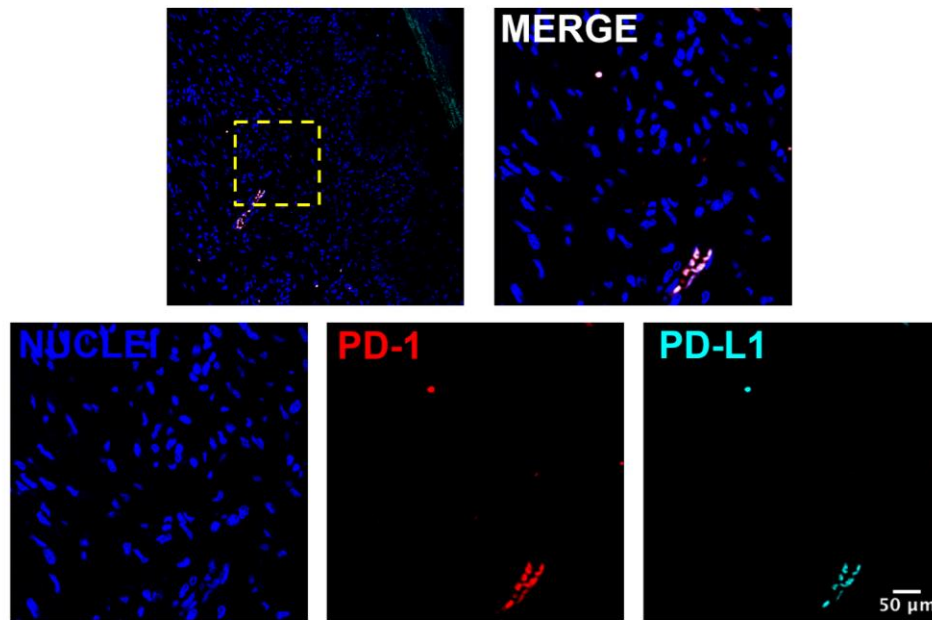

**Supplementary Figure S3.** PD-1 and PD-L1 autofluorescence staining control. Tissue was processed in the same way as the experimental staining, except no antibodies anti-PD-1 and -PD-L1 were added. Top panels show the merged images at 20x (left) and a digital zoom of the selected area (right). Low panels show the signal of each channel to provide a better appreciation of the autofluorescence of each fluorochrome in the tissue.

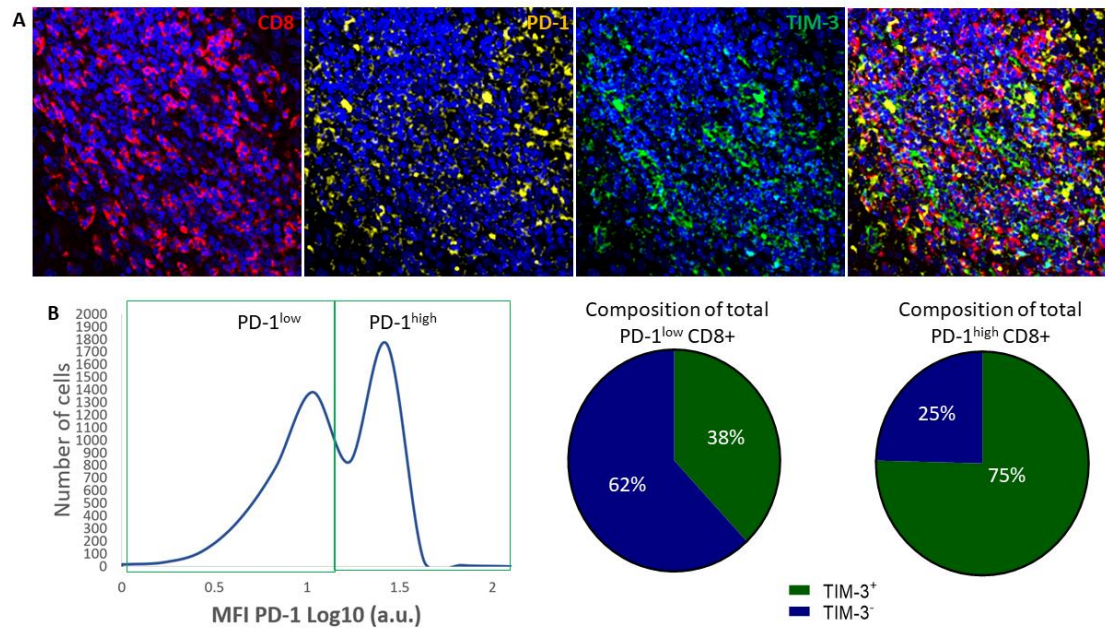

**Supplementary Figure S4.** TIM-3 expression on PD-1 low and high CD8 T cells. A) Representative immunofluorescence image stained for CD8 (red), PD-1 (yellow), TIM-3 (green) of acral melanoma patients (n = 5). B) Histogram showing the regions where the pie charts were obtained (green squares). The left pie chart represents the percentage of cells that are TIM-3 positive or negative on PD-1 low CD8<sup>+</sup> cells fraction. The right pie chart represents the percentage of cells that are TIM-3 positive or negative on PD-1 high CD8<sup>+</sup> cells fraction.



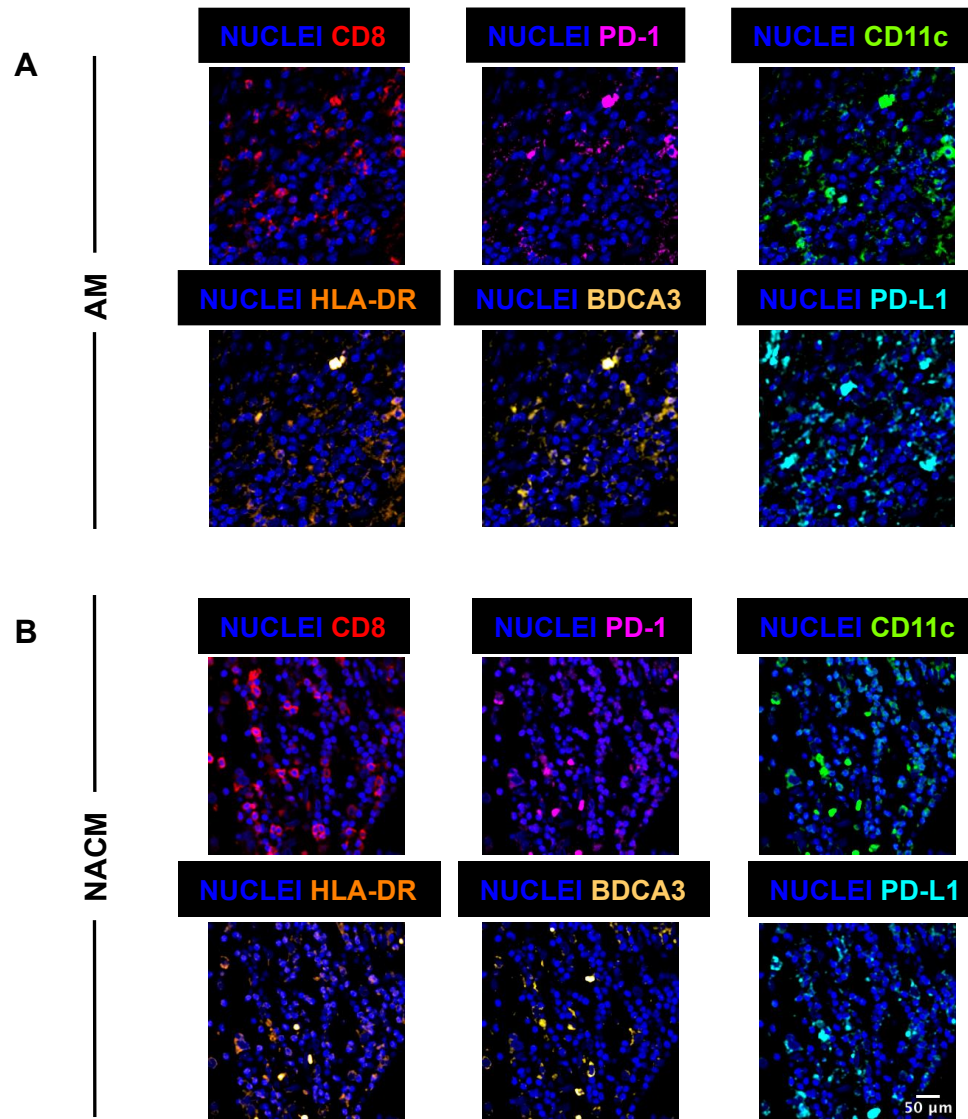

**Supplementary Figure S5.** Multiplexed Immunofluorescence of PD-1 and PD-L1 expression in CD8 T cells and dendritic cells. Representative images of the reconstructions of every analyzed mark for **(A)** AM and **(B)** NACM patients. CD8 (red), PD-1 (magenta), CD11c (green), HLA-DR (orange), BDCA3 (yellow) and PD-L1 (cyan).



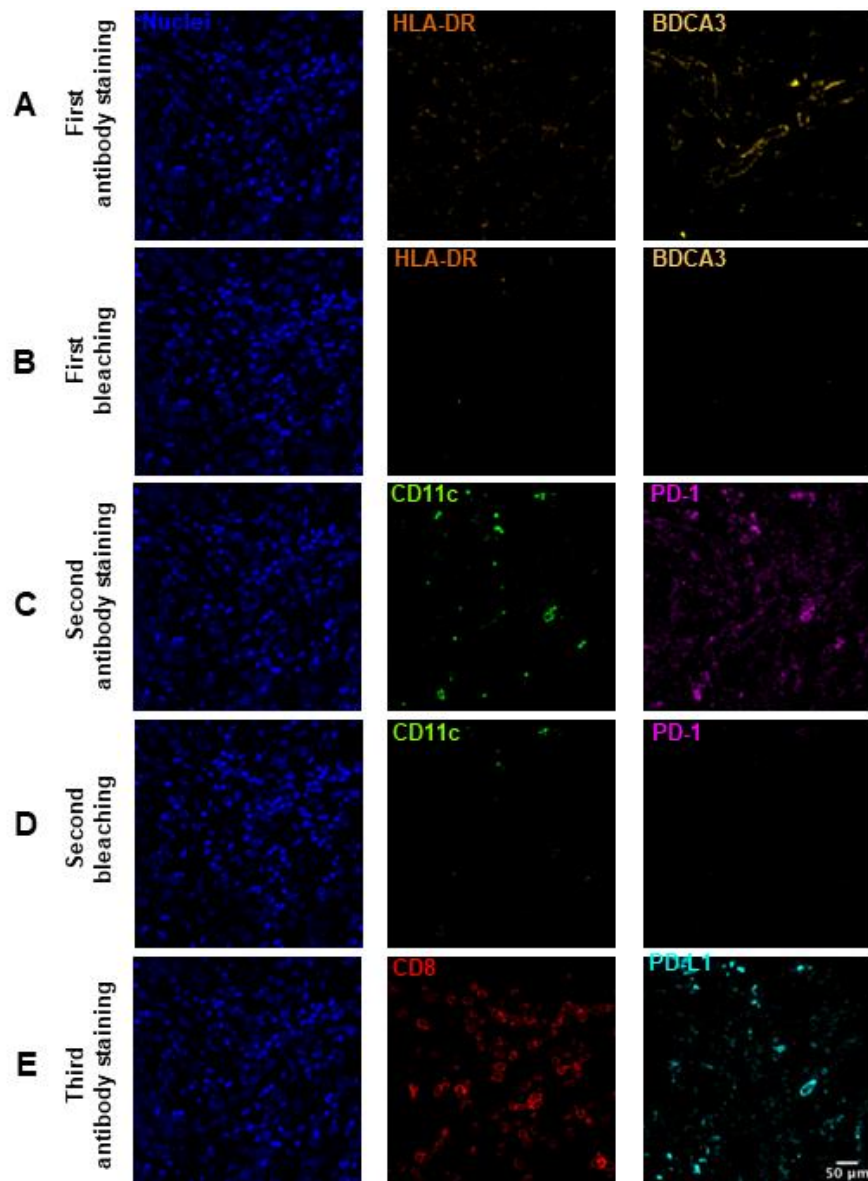

**Supplementary Figure S6.** Signal removal upon each bleaching cycle for the multiplexed immunofluorescence of PD-1 and PD-L1 expression in CD8 and dendritic cells. Representative images acquired after every staining and bleaching cycle. First staining (A) included anti-HLA-DR (orange) and anti-BDCA3 (yellow), and bleaching cycle (B) in which marks in (A) are not further detectable. Second staining (C) included anti-CD11c (green) and anti-PD-1 (magenta) and bleaching cycle (D) in which marks in (C) are not further detectable. E) Final staining with anti-CD8 (red) and anti-PD-L1 (cyan).

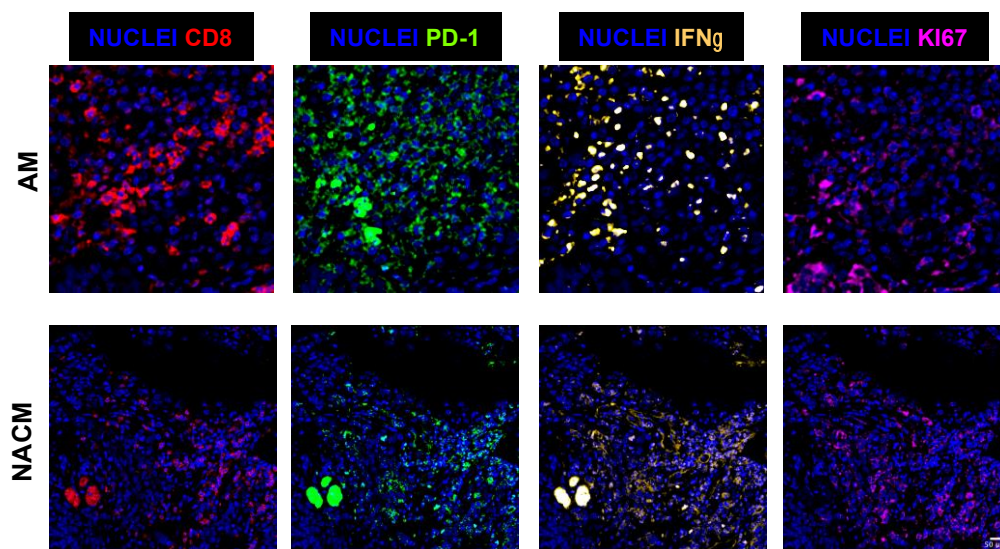

**Supplementary Figure S7.** Multiplexed immunofluorescence to assess the expression of markers of function in PD-1<sup>+</sup> CD8 cells. Representative images of the reconstructions of every analyzed staining for AM and NACM patients. CD8 (red), PD-1 (green), IFN- $\gamma$  (yellow) and KI-67 (magenta).

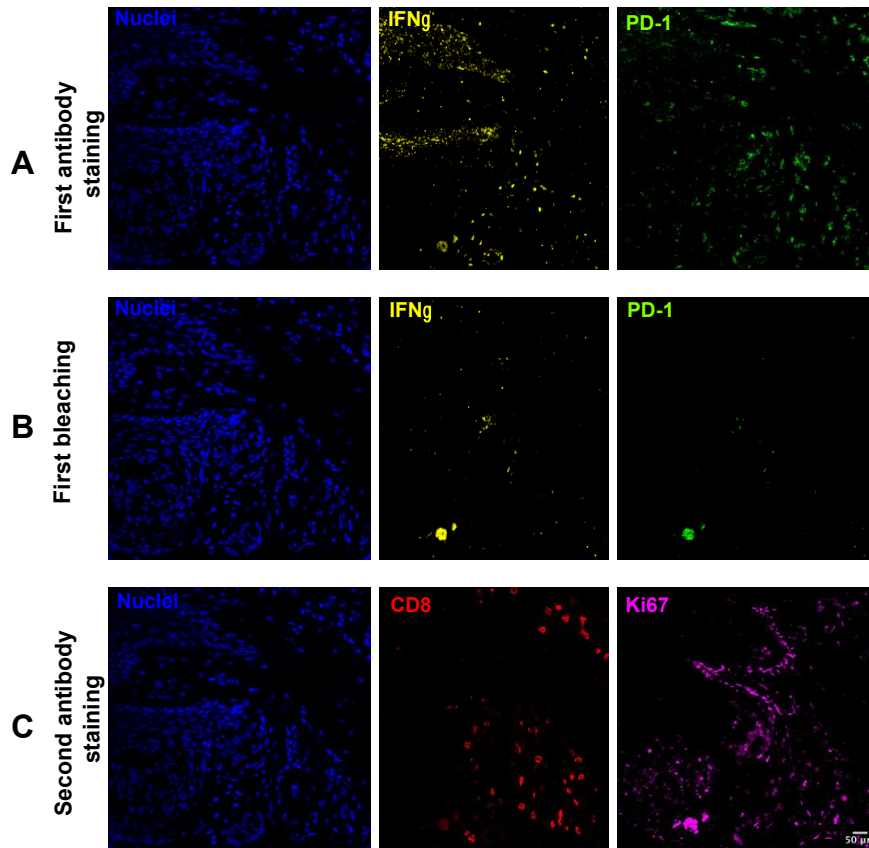

**Supplementary Figure S8.** Signal removal upon each bleaching cycle for the multiplexed immunofluorescence of PD-1 and PD-L1 expression on CD8 PD-1 cells. Representative images acquired after every staining and bleaching cycle. First staining (A) included anti-IFN- $\gamma$  (yellow) and anti-PD-1 (green), and bleaching cycle (B) in which marks in (A) are not further detectable. C) Final staining with anti-CD8 (red) and anti-KI-67 (magenta).

### A) Gating strategy

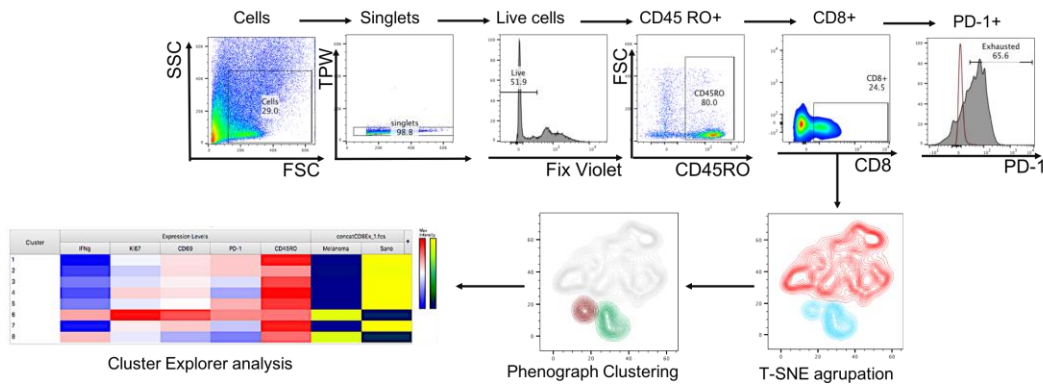

### B) Stain Controls

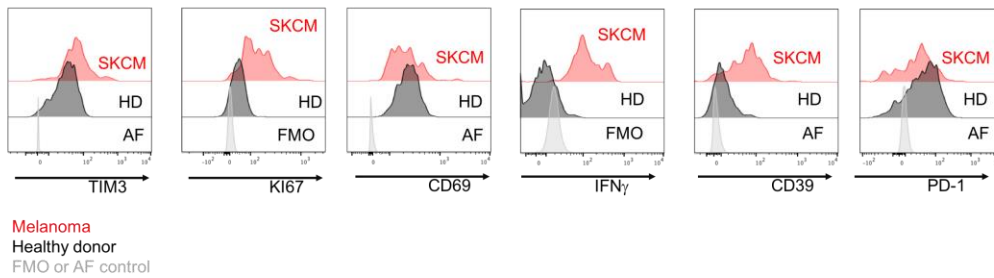

**Supplementary Figure S9.** A) Gating strategy for the flow cytometry data of Figure 7. Lymphoid cells were gated from SSC and FSC parameters, followed by singlets selection, live cells (viability dye negative), memory cells (CD45RO+) and CD8+ cells. Histograms were obtained from CD45RO+ CD8 T cells as well as the T-SNE plot. B) Staining controls were used to establish the positive thresholds for each marker. Autofluorescence (AF) was used for membrane antigens (TIM-3, CD69, CD39 and PD-1), while fluorescence minus one (FMO) controls were used for intracellular and nuclear antigens (KI-67 and IFN- $\gamma$ ). Red histograms (melanoma), black histograms (healthy donor) and grey histograms (staining controls)
